# Supplementary material
Source: ML conference proceedings conference paper supplement (https://openaccess.thecvf.com/content/ICCV2025/html/Boudjoghra_ScanEdit_Hierarchically-Guided_Functional_ICCV_2025_paper.html)
Supplement: Supplementary file 1 [file Boudjoghra_ScanEdit_Hierarchically-Guided_Functional_ICCV_2025_supplemental.pdf]

# –Supplementary Material–

## ScanEdit: Hierarchically-Guided Functional 3D Scan Editing

Mohamed El Amine Boudjoghra<sup>1</sup>   Ivan Laptev<sup>2</sup>   Angela Dai<sup>1</sup>

<sup>1</sup>Technical University of Munich

<sup>2</sup>Mohamed Bin Zayed University of Artificial Intelligence

### 1. Completing missing geometry

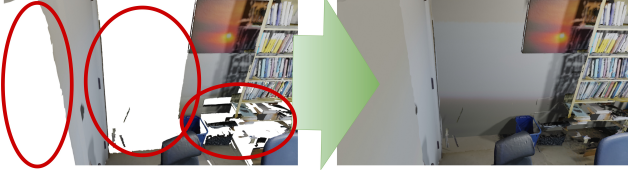

Figure 1. Missing geometry completion results

To complete missing geometry after editing the scene, we use a heuristic plane-based method. Our goal is to keep the region empty after removing objects, unlike 2D inpainting approaches like Infusion [1], which tend to hallucinate new content in the edited areas. Instead of inpainting, we assume that removed objects rest on a support surface (e.g., table or floor). We project the object’s points onto this surface and use Delaunay triangulation estimate mesh faces for the projected points. This helps preserve continuity of the support plane and adjacent walls, avoiding visual holes in the reconstructed scene.

Let  $\mathcal{P}_{\text{obj}}$  be the set of 3D points belonging to the object, and  $\pi_{\text{sup}}$  the support plane. We project each point  $\mathbf{p} \in \mathcal{P}_{\text{obj}}$  onto  $\pi_{\text{sup}}$  by computing:

$$\mathbf{p}_{\text{proj}} = \mathbf{p} - (\mathbf{n}^\top (\mathbf{p} - \mathbf{c}))\mathbf{n}$$

where  $\mathbf{n}$  is the normal of  $\pi_{\text{sup}}$ , and  $\mathbf{c}$  is a point on the plane. The set of projected points is then triangulated using Delaunay triangulation to reconstruct the surface geometry.

For color prediction, we adopt a mirror reflection strategy based on scene geometry rather than the plane. Specifically, for each point  $\mathbf{q}$  on the completed geometry, we first find its nearest neighbor  $\mathbf{p}_{\text{nn}} \in \mathcal{P}$  in the original scene:

$$\mathbf{p}_{\text{nn}} = \arg \min_{\mathbf{p} \in \mathcal{P}} \|\mathbf{q} - \mathbf{p}\|_2$$

We then reflect  $\mathbf{q}$  across  $\mathbf{p}_{\text{nn}}$  to obtain a mirrored location  $\mathbf{q}'$ :

$$\mathbf{q}' = 2\mathbf{p}_{\text{nn}} - \mathbf{q}$$

Finally, we assign to  $\mathbf{q}$  the color of the nearest point to  $\mathbf{q}'$  in the original point cloud:

$$\text{Color}(\mathbf{q}) = \text{Color} \left( \arg \min_{\mathbf{p} \in \mathcal{P}} \|\mathbf{p} - \mathbf{q}'\|_2 \right)$$

where  $\mathcal{P}$  is the set of all original scene points with known color values.

This approach allows us to generate plausible surface completions and assign color in a geometry-aware way, avoiding artificial content and ensuring visual consistency with the original scene.

In order to filter out noise and get a smooth color for the completed region, we apply a median filter.

### 2. Results with machine generated class agnostic masks

We use predicted masks from Mask3D [2], trained on the ScanNet++ training set. Figure 2 shows results on two scenes: one from the ScanNet++ validation set and the other from the Replica dataset. We start by predicting instance masks using Mask3D and apply non-maximum suppression (NMS) to remove overlapping ones. Then, we run connected components on the remaining parts of the 3D scene to extract other instances that Mask3D fail to detect. For walls and floors, we use plane segmentation—identifying planar regions in the point cloud. The floor is selected as the plane with the highest upward-facing normal (along the z-axis) with lowest height, and the ceiling as the one with the lowest z orientation and highest height, while walls are selected as the planes perpendicular to the floor. To annotate the masks, we render 2D masks onto the undistorted DSLR images and use LLAMA Vision to predict node attributes like class name, color, and so on.

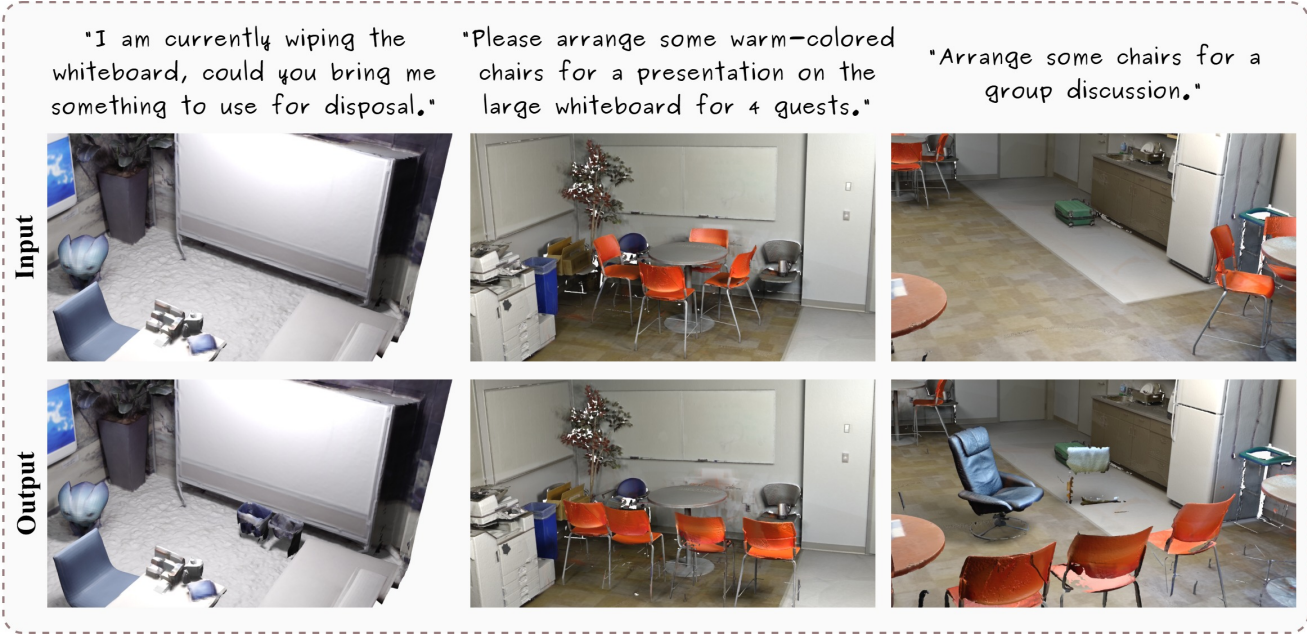

Figure 2. Editing results of our method with instance segmentation masks generated by Mask3D [2], and trained on ScanNet++ [4] training set. We show the results on two scenes, one from Replica [3] and ScanNet++ [4] validation set.

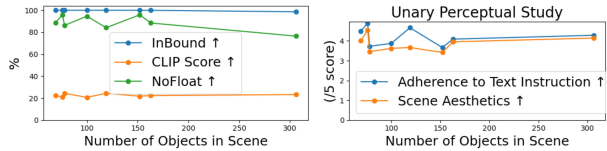

Figure 3. **Scene complexity study.** This figure shows how our method performs across 8 scenes with varying numbers of objects, ranging from 69 to 306. Our approach consistently maintains high performance on both geometric and semantic metrics, even as scene complexity increases.

### 3. Effect of maximum number of target locations on the performance

Table 1 shows the effect of limiting the maximum number of target locations considered by the planner when transforming an object. The results indicate that the best performance is achieved when the LLM is allowed to dynamically determine the number of target locations based on the structure of the target graph—such as relevant support objects or available support surfaces.

Table 1. Ablation over # of samples; 50% subset evaluation

| Samples ↓             | NoFloat (%)↑ | InBound (%)↑ | ColVol ( $m^3$ )↓ | PloU ↓      |
|-----------------------|--------------|--------------|-------------------|-------------|
| 1                     | 77.94        | 94.55        | 0.1681            | 0.34        |
| 3                     | <b>85.91</b> | 96.27        | 0.1611            | 0.33        |
| 5                     | 79.88        | 93.14        | 0.1766            | 0.36        |
| LLM controlled (Ours) | 83.56        | <b>99.48</b> | <b>0.1528</b>     | <b>0.32</b> |

## 4. Additional Perceptual Study Details

In our perceptual study, we conducted both a binary and a unary perceptual evaluation to assess the quality of edited 3D scenes. The unary perceptual study required participants to score each generated scene on two key criteria: **Adherence to Instruction** and **Layout Quality**. Participants were presented with a single edited 3D scene and asked to rate it on a scale from 1 (**Strongly Disagree**) to 5 (**Strongly Agree**) for each criterion. **Adherence to Instruction** evaluates how well the edited scene aligns with the given text instruction, ensuring that modifications accurately reflect the specified changes. **Layout Quality** assesses the overall spatial arrangement and positioning of objects, considering factors such as coherence, realism, and usability within the scene. This evaluation provides a fine-grained assessment of different methods’ ability to generate high-quality and instruction-consistent scene modifications.

## 5. Geometric Evaluation Metric Details

### 5.1. Collision metric (ColVol)

First, we construct a bounding volume hierarchy with depth of 8 for each object in the scene to approximate its shape using bounding boxes at multiple levels (We show in Fig. 6 the visualization of bounding volumes hierarchy at different levels). We estimate the colliding volumes between pairs of objects using the sum of intersections of bounding volumes at level 8 in the bounding volume hierarchy.

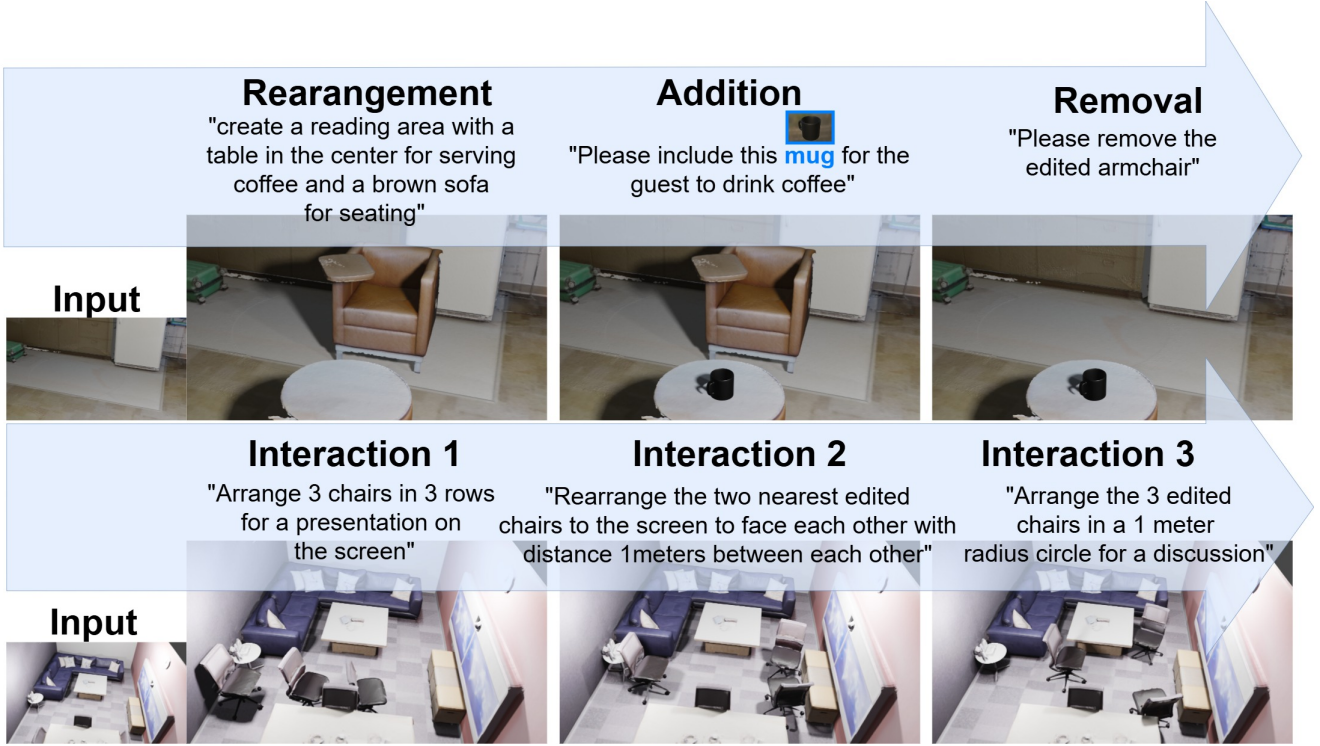

Figure 4. We show in this figure that our method naturally supports interactive editing. Information about the edited object can be passed in as context along with the updated scene graph to help refine the output further. We also demonstrate support for adding new objects: given an asset to insert, we scale it to match the typical height of its category (as suggested by an LLM). For object removal, the LLM is instructed to flag the corresponding node in the graph during the planning stage.

## 5.2. In boundry metric (InBound)

For all objects that are moved in the edited version of the scene, we report the percentage of points which are inside the floor contour. For this, we compute the signed distance using the floor contour points and floor contour normals.

## 5.3. Percentage of non floating objects (NoFloat)

For each object that has been moved, we check if it is supported by a support surface or not with 1cm threshold. An object is considered floating if it is elevated more than 1cm distance from the nearest support surface. In NoFloat metric we report the percentage of objects that are not floating.

# 6. Estimating graph edges with 3D heuristics

## 6.1. Estimating ‘on top of’ support surface relation

We assign each object in the graph nodes  $N$  to the closest support surface, provided that the difference between the object’s min-imum height and the surface is less than 5 cm.

## 6.2. Estimating ‘against wall’ relation

An object  $o_i$  is defined as against a wall  $o_j$  if its front normal  $\vec{F}_i$  aligns with the front normal  $\vec{F}_j$  of the wall and the minimum distance between the wall and the object is less than 5cm.

## 6.3. Estimating ‘facing’ relation

An object  $o_i$  is defined to be ‘facing’ another object  $o_j$  if the front normal  $\vec{F}_i$  of  $o_i$  is aligned with the directional vector  $\vec{d} = c_{o_j} - c_{o_i}$ , where  $c_{o_i}$  is the center of object  $o_i$ .

# 7. Subgraph identification

In the subgraph identification phase, we use an LLM,  $\Phi$ , to reduce the set of objects to only relevant classes using prompt 7.1. Then, within these selected classes, we retrieve relevant nodes based on attributes like color, material, and description using prompt 7.2. Next, we identify the key edges with prompt 7.3 that correspond to spatial instructions—for example, an instruction like “organize the top of the cabinet” refers to the ‘on top of’ edge, with the cabinet serving as its reference node.

## 7.1. Class pruning prompt



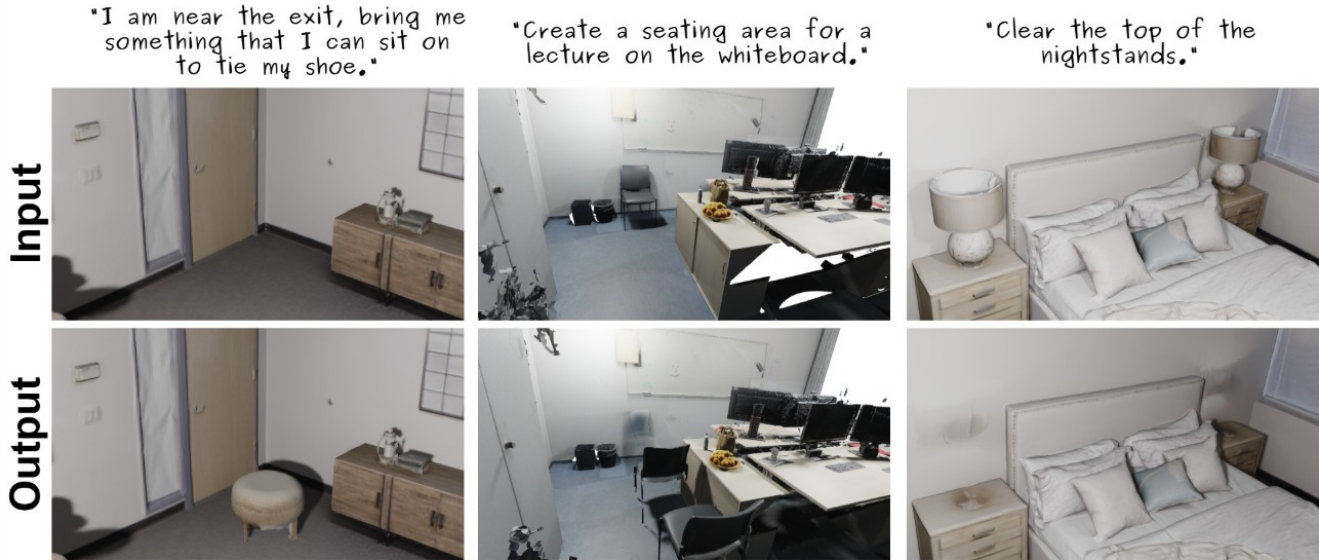

Figure 5. Additional results with ground truth masks on additional scenes. We follow the editing by our planar geometry completion method.

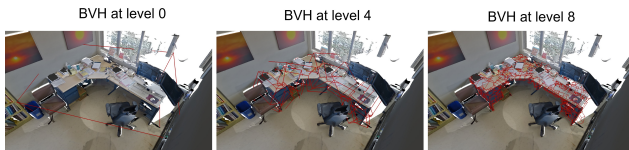

Figure 6. We show in this figure the bounding volumes of the instance object table at different levels in the bounding volume hierarchy BVH. We compute the colliding volumes between objects at level 8 as the sum of intersections in cube meters  $m^3$ .

Relevant class selection prompt:

You will be given a list of class names and your role is to locate the classes of interest. The classes of interest are objects to be moved and potential target locations. The classes don't have to be explicitly mentioned in the prompt; you must infer them from the context, especially the target locations where objects should be moved.

Among the following classes `<objects>`  
`list_of_class_names</objects>`, which ones are relevant to `"{instruction}"`?

Please give only the necessary class names to execute the task and make sure to return them in the tag:

`<objects>`[place list of objects here]`</objects>`.

Tips:

- Relevant classes do not necessarily need to be explicitly mentioned in the instruction. You should analyze the instruction and determine the most logical target location based on its

context. For example, if the instruction is to "clear the inside of the fridge," and the class list includes a kitchen counter, it should also be considered. The kitchen counter is the most logical place to place the items, as it fits the context of the task

- You must consider only class requirements; don't try to look for objects based on spatial relations like "close to" or "on top of." For example, "empty the inside of the fridge" means that the relevant classes are fridge and a potential location where to place the items, like a kitchen counter or table.
- Your role is to identify the most relevant classes based solely on semantics, without considering spatial relationships. For example, in the instruction "Move objects from inside the cabinet," your focus should be on the cabinet and a suitable target surface for placing the objects, such as a table or the floor. Do not attempt to determine which specific objects are inside the cabinet from the given list.

Important:

- The classes you return should be in the provided list of class objects; don't hallucinate any new class names.
- For every object class to be moved, you must return the most logical target class where it is going to be placed relative to either "close to" or "on top of" one of its support surfaces.

**Examples** of objects relevant to instruction:  
`{Examples}`

Very important: return classes from the provided list, don't hallucinate classes outside of it. If the instruction indicates prular objects you ust retrieve the closest from the set <objects>{**list\_of\_class\_names**}

- The final output must be in XML format:

## 7.2. Instance retrieval with node attributes

You are a helpful assistant responsible for filtering out irrelevant objects based on some color, material, or size that might be mentioned in a given instruction. You will receive a list of objects, each with an ID, color, and material. Your task is to identify and return the object IDs that align with the instruction. If the instruction does not specify any attributes for the desired objects, return all object IDs.

Additionally, some objects serve as target locations for placing other objects according to the instruction. If no specific attributes are mentioned for these target objects, they should be retained.

If no color or material are requested in the instructions return all IDs.

Note: please select object that need to be moved as well as target objects.

Objects list with their object ids, class name, list of major colors, list of materials:

{**Objects\_details**}

Instruction is :  
{**Input\_instruction**}

Please end your thinking with <relevant\_ids>[ place the list of ids which align with the instruction here]</relevant\_ids>

Tips:

- Relevant classes do not necessarily need to be explicitly mentioned in the instruction. You should analyze the instruction and determine the most logical target location based on its context. For example, if the instruction is to "clear the inside of the fridge," and the class list includes a kitchen counter, it should also be considered. The kitchen counter is the most logical place to place the items, as it fits the context of the task.
- You must consider only semantic attributes like color, material, and specific object characteristics as filtering requirements, don't try to look for objects based on spatial relations like close to or on top of. For example 'empty the inside of the fridge' means that the relevent classes are fridge and

potential location where to place the items like kitchen counter or table.

Very Important:

- Don't filter any object out unless a color or material attribute is requested.
- Your task is to return the IDs of objects strictly from the provided list. For each object selected, you must include at least one target object ID from the list to indicate its placement relative to another object (e.g., near the door, on the table, or on the floor).

**Examples** of objects relevent to instruction:  
{**Examples**}

## 7.3. Identifying relevent edges

You are a Helpful Assistant. Your task is to determine how an object should be retrieved based on the given instructions. Do not try to make a plan for placing the objects. You must focus only on understanding whether retrieval involves relations or not. Guideline for Identifying the Object to Move and Retrieval Type

Identify the Object to Move

Look for action verbs like move, place, put to determine what is being acted upon.

Example: "Move the chair." (Chair is the object to move).

Check for Relations

If a prepositional phrase (e.g., next to the table) describes the destination, it is retrieval without relations ("Move the chair next to the table.").

If the phrase describes the current position, it is retrieval with relations ("Move the chair that is next to the table.").

Determine Retrieval Type

Without Relations: The object is retrieved by intrinsic properties (e.g., color, type).

With Relations: The object is retrieved using another object as a reference.

Edge Cases

If no reference is mentioned, assume retrieval without relations.

Multiple objects should be checked for independent or dependent relationships.

Your role is to analyze retrieval type, not to decide where to place objects.

You will receive a list of objects, each with details such as their IDs, colors, and

materials. The instruction provided may ask for objects relative to others in this list. Your task is to analyze the instruction and identify the objects that can serve as references to locate the target objects.

For example:

If the instruction is: "Could you please empty the kitchen counter, then move items from the fridge to the kitchen counter?", the fridge has a relation "on top" with all possible surfaces, and the kitchen counter is also referenced as "on top." In this case, return the relevant object IDs based on these relationships.

Objects list with their object ids, class name, list of major colors, list of materials:

**{Objects\_details}**

Instruction is :  
**{Input\_instruction}**

Please end your thinking with the following xm format  
```xml  
<objects>  
 <object>  
 <id>[please the object id here]</id>  
 <surface\_ids>[please place the desired surface ids here seperated by a comma]</surface\_ids>  
 <relation>[please place the required relations here seperated by comma, you must choose from 'on top', 'facing', 'against wall']</relation>  
 </object>  
</objects>  
 ...

Important regarding surface IDs: A surface is the area where objects can be placed in an object, each object has surfaces with several IDs from 0 and up, the surface with the lowest elevation has the highest ID.

Example for surfaces: if there are three surfaces with ids 0,1,2,3 the lowest id corresponds to the top surface in this case ID 0 where the highest ID corresponded to the lowest surface in this case 3.

**Examples** that can help you understanding if the instruction requires retrieving with spatial constraints or not:  
**{Examples}**

Hint how to address this task assigned to you:  
First, evaluate the instruction to determine whether any objects need to be retrieved in relation to others. If no objects are to be retrieved in relation to others, return an empty XML tag as follows: xml<objects></objects>.

## 8. Prompts for planner

In the planning phase, we generate first a plan where the LLM  $\Psi$  generates a detailed plan while considering different target locations which define the hypotheses for moving each object, then it selects the best one while taking into account physical plausibility in support surfaces (max height does not accommodate the object to be moved or the surface is full).

### 8.1. Prompt for generating a plan

You will be given a list of objects with their ids colors and materials, you have to suggest a plan on how to place objects to execute the instruction.

Important analysis before planning how objects should be moved:

Analyze the instruction and keep the movement of objects to the minimum, while insuring the instruction is satisfied. For example if the goal is to create a seating area to whatch TV, the TV should not be moved.

Objects list with their object ids, class name, list of major colors, list of materials:

**{Objects\_details}**

Instruction is :  
**{Input\_instruction}**

Important: emphasis on objects that should not be moved in the plan, an example is " place the chairs to watch TV" the TV should remain untouched and the chairs should be placed in front of it while facing it.

Please end your thinking with <placement\_plan>[ place your detailed plan by specifying object ids and class names here]</placement\_plan>

Important: emphasis on objects that should not be moved in the plan, an example is " place the chairs to watch TV" "arrange chairs for presentation on a screen" the TV and screen should remain untouched and the chairs should be placed in front of it while facing it.

**{Support\_surfaces\_details}**

Important when suggesting the plan:

- please suggest a target location for every object you want to move relative to other objects or the floor, even if the instruction is vague.

For example if an instruction says to clear a table, you must identify what objects are on the table and suggest new locations for these objects

- First analyze all potential target location , and place object relative to the most logical targets. Example, an instruction 'move the chair' has multiple targets but the most logical one is close to a table

- If the target location is support object, please make sure to suggest which surface among the object surfaces it should go to in the plan
- Some objects are better stacked on each other, for example papers and boxes should be stacked on each other if they are to be organized. where the largest one with dx,dy is the first.
- The object level instruction must refer to an object (if desired to be placed close to it) or one of its surfaces (if desired to be placed on a surface) that exists in the list of objects.
- Make the plan with natural language only, don't suggest to place objects in specific coordinates.
- It is very important to pay attention to objects coordinates, since there are multiple objects with same functionality but different sizes. e.g. a large plant cannot be placed on top of a table, but a mid-sized or small plant one can be which gives a better vibe to the space.

When should you stack objects on top of each other:

- Some objects like papers or boxes are better stacked on top of each other, in this case the plan should be:
  - place largest box on some surface 0 of another object or floor.
  - place second smallest box on the placed box.
  - and so on ...
- If three objects a (largest), b (smallest), c (medium) are to be stacked on top of each other a should be on a surface floor, or table, etc as it is the base of the stack, c should be on surface ID 0 of a, and b should be on surface ID 0 of c.

When to use the coordinates:

- Each object has x,y coordinates use them to figure out far or close objects if mentioned in the instruction. It is strict to not include any coordinates in the final placement plan.

How to handle instructions with few details:

- Try to make a plan that can be physically plausible, for example placing 10 sofas for a presentation can not be done in one row, you have to place them in multiple rows in this case 3 rows would be good.

## 8.2. Prompt for converting the plan into hierarchical graph

You will be given a list of objects with their ids colors and materials and a plan to place these objects. Your role is to return the logical dependency between objects and format the placement of objects in a hierarchical

manner starting from the floor. Please strictly follow the placement plan

Important analysis before planning how objects should be moved:

Analyze the instruction and keep the movement of objects to the minimum, while ensuring the instruction is satisfied, pay attention to the placement plan, some objects are best to be kept untouched you need to reflect that in the object level instruction in the hierarchy. For example if the goal is to create a seating area to watch TV, the TV should not be moved. In this case the TV will nest the objects for seating, while having the instruction "keep the TV untouched".

Placement plan: 'place the table with id 10 near the door id 12 and a bottle with id 1 on top of the table (surface ID 0 of the table) with id 10, and the chair id 50 facing the table.'

Hierarchical Structure for Object Placement

The hierarchy follows a nested dependency model, where objects are placed relative to their parent objects. This ensures spatial constraints are logically maintained.

### 1. Root Level (Floor)

The floor is the base of the environment, meaning all objects are ultimately placed on it.

The floor itself remains static and untouched, serving as the foundational layer for all placements.

### 2. First Nested Level (Door)

The door (ID 12) is placed directly on the floor, meaning it is positioned independently.

Since the door is static like the floor, it does not move or act as a container for other objects.

### 3. Second Nested Level (Table)

The table (ID 10) is placed near the door (ID 12).

This means the table's position is spatially related to the door but not contained within it.

Since the table is a movable object, its placement depends on the door's position.

### 4. Third Nested Level (Chair & Surface)

The chair (ID 50) is placed facing the table (ID 10), making it dependent on

the table for its orientation.  
The table's surface (ID 0) is an implicit subcomponent of the table and serves as a placement area for smaller objects.

While the surface is not a separate object, it acts as a reference point for placing items on the table.

#### 5. Fourth Nested Level (Bottle)

The bottle (ID 1) is placed on top of the table (specifically, surface ID 0). Since the surface belongs to the table, the bottle is indirectly dependent on the table's placement.

#### Purpose of the Hierarchy

The structure enforces a logical dependency between objects. For example:

The bottle's placement depends on the table.

The table's placement depends on the door.

The chair and surface placement depends on the table.

The door's placement depends on the floor.

This hierarchical representation reflects real-world relationships and ensures clarity in placement instructions.

How to approach this:

- You need to figure out the group center and what objects but be placed relative to the group centers.
- The group centers are placed relative to the floor, while the group members are placed relative to the group centers.
- If an object is placed in relation to other object it should be nested in it.

Final format (You must follow this output format)

```
:
xml '''
  <object>
    <name>floor</name>
    <id>floor_id</id>
    <instruction>leave the floor untouched as
      floors cannot be moved</instruction>
  </object>
  <object>
    <name>door</name>
    <id>12</id>
    <instruction>leave the door untouched
      </instruction>
  </object>
  <object>
    <name>table</name>
    <id>10</id>
    <instruction>place the table
      close to the door with id
      12</instruction>
  </object>
  <object>
    <name>surface</name>
```

```
<id>0</id>
<instruction>Leave surface ID
  0 untouched as it is
  part of the table</
  instruction>
</object>
<object>
  <name>bottle</name>
  <id>1</id>
  <instruction>place
    the bottle on top
    of the surface
    with ID 0</
    instruction>
</object>
```

```
</object>
<object>
  <name>chair</name>
  <id>50</id>
  <instruction>place the chair
    id 50 in front of the
    table, facing the table</
    instruction>
```

```
</object>
```

```
</object>
```

```
</object>
```

```
</object>
```

```
'''
```

Extremely Important for the nesting:

Even if an object doesn't move it must nest related objects.

Now please proceed with the following:

Placement plan :  
{**placement\_plan**}

Dependency plan:  
{**dependency\_plan**}

Structured xml hierarchy:

Please proceed with the step by step thinking then end it with xml output here

Important notes:

- If an object is placed in relation to other object (on top of, close to, near etc) it should be directly nested in it.
- Please nest the desired surface in its corresponding object parent if exists in the placement plan.
- An object is nested only if it should remain untouched or placed relative to the parent, but not moved from the parent.

Example when not to nest: the cup should not be nested in the fridge in 'move the cup from the fridge'

Example when to nest: the cup should be nested in surface id 1 and surface id 1 should be nested in the fridge in 'place the cup in surface 1 in



the fridge'

Important regarding object level instructions:

- Add the word 'untouched' in the instruction if the object is a surface or should not be moved. Surface instruction should always be 'leave surface untouched'

Very important:

- You must return the structure that enforces a logical dependency (use the dependency plan in order to figure out which object is nested in which) between objects to figure out which object relates to which object before generating the xml nests
- If an object is not explicitly mentioned to be moved in the placement plan you should leave it untouched, your role is to structure the placement plan in a nested structure following the dependency plan

Extremely important note: You must move only the objects that are mentioned to be moved in the instruction. For example 'move glass to the fridge' means the fridge must stay in place

## 9. Prompt for hierarchical object placement

You will be given a reference object and a list of objects that you need to place relative to a reference object. Your role is to think step by step and suggest new locations, orientations, and constraints for the list of objects.

Each object has to be placed following its instruction, you must suggest 3D coordinate for the base of the object, an orientation of the object, and a list of constraints with respect to the reference object.

The representation of the reference object:

- The reference object is represented with
  1. Its base coordinate, which represents the 3D coordinate of the object with the minimum elevation (z) in meters and center in x and y.
  2. Its dimensions which represent the height (following the z axis), the width (following the x axis), the depth (following the y axis) in meters
  3. Its orientation, which refers to the orientation of the object around the z axis, in degrees.
  4. Its surfaces which can be used for placing objects, each surface has an ID where id 0 represents the surface with the highest elevation, the elevation is in meters.

5. List of objects that are on top of the object

The representation of the List of object to be placed relative to the reference

object {**Parent\_object\_name**} id {

**Parent\_object\_id**}:

1. its base coordinate, which represents the 3D coordinate of the object with the minimum elevation (z) in meters and center in x=0 and y=0.
2. Its orientation, which refers to the orientation of the object around the z axis, in degrees.

The possible list of constraints with respect to the reference object {

**Parent\_object\_name**} id {**Parent\_object\_id**} are:

- in\_surface : this constraint concerns only instructions that require placing objects inside or on top of a reference object, if the instruction requires placing an object on top, that means the surface ID is 0 since it is the one with the highest elevation
- facing: This constraint concerns objects which should be facing the reference object in a natural setting, for example a chair should be facing a reference object whiteboard.

Important details when reporting the final location and orientation:

- Don't perform the math operation instead report the formula with values and operations to get the new location or orientation. The allowed operations are :: for multiplication, /: for division, -: for minus, +: for summation, cos: for cosine function, sin: for sin function. angles should be in degrees.

Hint on relations between objects:

- If an object is facing another, its orientation should be 180 degrees minus the orientation of the other object
- if an object is facing the same direction as another, both should have the same orientation

Important details on the reference object's {**Parent\_object\_name**} id {**Parent\_object\_id**} orientation and location:

- the reference object is oriented towards (meaning its front) the positive direction of the x-axis. And its base coordinate is located near the origin.

Output format:

Please end your step by step thinking with the following xml which summarizes the new locations , new orientations and list of constraints of objects with respect to the reference object relative to the reference object {**Parent\_object\_name**} id {**Parent\_object\_id**}:

```
xml '''
<objects>
  <object>
    <id>[please place the object ID here]
    <name>[please place the object name here]
    <new_base_coordinate>[please place here the new base coordinate of the object]
    <new_orientation>[please place here the new orientation the object]
    <constraints>
      <facing>[please mention here wheather the object should be facing the reference object {Parent_object_name} id {Parent_object_id} or not, answer with yes or no]
      <in_surface>[If the object should be in one of the surfaces place the surface ID here, if not place None]
      <distance_to_reference>[please place the distance to the reference object here]
    </constraints>
  </object>
</objects>
'''
```

Reference Object:

{**parent\_object\_details**}

List of Objects to be placed with their instructions:

{**objects\_to\_be\_placed**}

{**floor\_details**}

Now please proceed with your suggested new coordinates and orientations, taking into account that the reference object x center and y center are both 0,0 and this is similar to its base coordinate. It is also important to note that all objects are represented with base coordinate which is the center of the object in x and y and minimum elevation in z.

Important: the front of the reference object is in the positive x axis, thus if an object should be in front of it must be placed at x>0 and y that is bounded.

Important: you must use place the objects elevation (z axis) at the floor level if the object should be on the floor.

Important regarding in\_surface constraint: if the reference object is a surface of an object, please put the ID of the surface (which is a number, don't put something like fridge's surface or table's surface) in this constraint.

Very important: Pay attention to the instruction for each object, if an object should not be moved please don't include it in the xml list. If no object should be moved return an empty xml <objects></objects>

Left, right, front, and back sides conventions:

Left side with respect to the reference object is : y < 0

Right side with respect to the reference object is : y > 0

Front side with respect to the reference object is : x > 0

Back side with respect to the reference object is : x < 0

Very important when placing objects against walls or other objects:

If an object is placed against a wall or another object <facing> should be no and the orientation of the object to be place should be the same as the reference object

If an object is against the wall, its x should be half the dx dimension of the object and y can range from -dy\_wall/2 to dy\_wall/2

Very important for the <facing> constraint which are with respect to the reference object {**Parent\_object\_name**} id {

**Parent\_object\_id**}:

If an object should be facing the same direction as the reference object {**Parent\_object\_name**} id {**Parent\_object\_id**} <facing> constraint should be set to no

Example (helpful for reasoning only):

- place chairs with respect to another reference object chair for a role that requires them to be in the same direction like guest watching TV, means that <facing> is no
- place chairs with respect to another reference object TV for a role that requires them to be in the same direction like guest watching TV, means that <facing> is yes

## References

- [1] Zhiheng Liu, Hao Ouyang, Qiuyu Wang, Ka Leong Cheng, Jie Xiao, Kai Zhu, Nan Xue, Yu Liu, Yujun Shen, and Yang Cao. Infusion: Inpainting 3d gaussians via learning depth completion from diffusion prior. *arXiv preprint arXiv:2404.11613*, 2024. [1](#)
- [2] Jonas Schult, Francis Engelmann, Alexander Hermans, Or Litany, Siyu Tang, and Bastian Leibe. Mask3d: Mask transformer for 3d semantic instance segmentation. In *2023 IEEE International Conference on Robotics and Automation (ICRA)*, pages 8216–8223. IEEE, 2023. [1](#), [2](#)
- [3] Julian Straub, Thomas Whelan, Lingni Ma, Yufan Chen, Erik Wijmans, Simon Green, Jakob J Engel, Raul Mur-Artal, Carl Ren, Shobhit Verma, et al. The replica dataset: A digital replica of indoor spaces. *arXiv preprint arXiv:1906.05797*, 2019. [2](#)
- [4] Chandan Yeshwanth, Yueh-Cheng Liu, Matthias Nießner, and Angela Dai. Scannet++: A high-fidelity dataset of 3d indoor scenes. In *Proceedings of the International Conference on Computer Vision (ICCV)*, 2023. [2](#)
